# Supplementary material
Source: MDPI journal article supplement (https://www.mdpi.com/2073-4441/16/6/887)
Supplement: s1 [file s1]

# Model-Assisted Optimization of Cobalt Biosorption on Macroalgae *Padina pavonica* for Wastewater Treatment

Abeer S. Aloufi <sup>1</sup>, Bahja Al Riyami <sup>2</sup>, Mustafa A. Fawzy <sup>3,4</sup>, Hatim M. Al-Yasi <sup>4</sup>, Mostafa Koutb <sup>5</sup> and Sedky H. A. Hassan <sup>2,\*</sup>

<sup>1</sup> Department of Biology, College of Science, Princess Nourah bint Abdulrahman University, P.O. Box 84428, Riyadh 11671, Saudi Arabia; asaloufi@pnu.edu.sa

<sup>2</sup> Department of Biology, College of Science, Sultan Qaboos University, Muscat 123, Oman; bahja@squ.edu.om

<sup>3</sup> Botany and Microbiology Department, Faculty of Science, Assiut University, Assiut 71516, Egypt; mafawzy@tu.edu.sa or mustafa.fawzy@aun.edu.eg

<sup>4</sup> Biology Department, Faculty of Science, Taif University, P.O. Box 11099, Taif 21944, Saudi Arabia; h.alyasi@tu.edu.sa

<sup>5</sup> Department of Biology, Faculty of Science, Umm Al-Qura University, Makkah 24381, Saudi Arabia; mmkoutb@uqu.edu.sa

\* Correspondence: s.hassan@squ.edu.om; Tel.: +968-93879120

**Table S1.** The actual response with RSM predicted data (the efficiency of Co(II) removal).

| Variables               | Code    | Levels      |               |              |           |
|-------------------------|---------|-------------|---------------|--------------|-----------|
|                         |         | Low<br>(-1) | Centre<br>(0) | High<br>(+1) |           |
| Algal dose (g/L)        | A       | 2           | 4             | 6            |           |
| pH                      | B       | 4           | 6             | 8            |           |
| Co(II) ion conc. (mg/L) | C       | 20          | 40            | 60           |           |
| Std. order              | Factors |             | Response %    |              |           |
|                         | A       | B           | C             | Actual       | Predicted |
| 1                       | 2       | 4           | 40            | 70.80        | 70.75     |
| 2                       | 6       | 4           | 40            | 84.38        | 84.57     |
| 3                       | 2       | 8           | 40            | 76.25        | 75.48     |
| 4                       | 6       | 8           | 40            | 84.78        | 84.25     |
| 5                       | 2       | 6           | 20            | 76.70        | 77.72     |
| 6                       | 6       | 6           | 20            | 87.95        | 89.02     |
| 7                       | 2       | 6           | 60            | 68.70        | 68.51     |
| 8                       | 6       | 6           | 60            | 80.55        | 79.81     |
| 9                       | 4       | 4           | 20            | 84.70        | 83.45     |
| 10                      | 4       | 8           | 20            | 85.60        | 85.66     |
| 11                      | 4       | 4           | 60            | 73.38        | 74.24     |
| 12                      | 4       | 8           | 60            | 75.47        | 76.44     |
| 13-17 <sup>a</sup>      | 4       | 6           | 40            | 80.18        | 79.95     |

<sup>a</sup> mean value of five center point assays.

**Table S2.** Comparison of Langmuir biosorption capacity of the studied biosorbent in removing Co(II) ions with different adsorbent capacities.

| Adsorbents                            | q <sub>max</sub> (mg/g) | References        |
|---------------------------------------|-------------------------|-------------------|
| mesoporous-activated carbon           | 5.8                     | [1]               |
| <i>Ulva fasciata</i>                  | 40.0                    | [20]              |
| Clearing nut seed powder              | 4.245                   | [31]              |
| <i>Sargassum wightii</i>              | 20.63                   | [59]              |
| Date pits                             | 6.28                    | [60]              |
| <i>Ficus benghalensis</i> leaf powder | 5.65                    | [61]              |
| <i>Padina sanctae</i>                 | 13.73                   | [62]              |
| <i>Sargassum</i> sp.                  | 3.12                    | [63]              |
| <i>Aspergillus niger</i>              | 33                      | [64]              |
| <i>Rhizopus chinensis</i>             | 11.5                    | [65]              |
| <i>Ulva lactuca</i>                   | 11.69                   | [66]              |
| <i>Padina pavonica</i>                | 17.98                   | The current study |

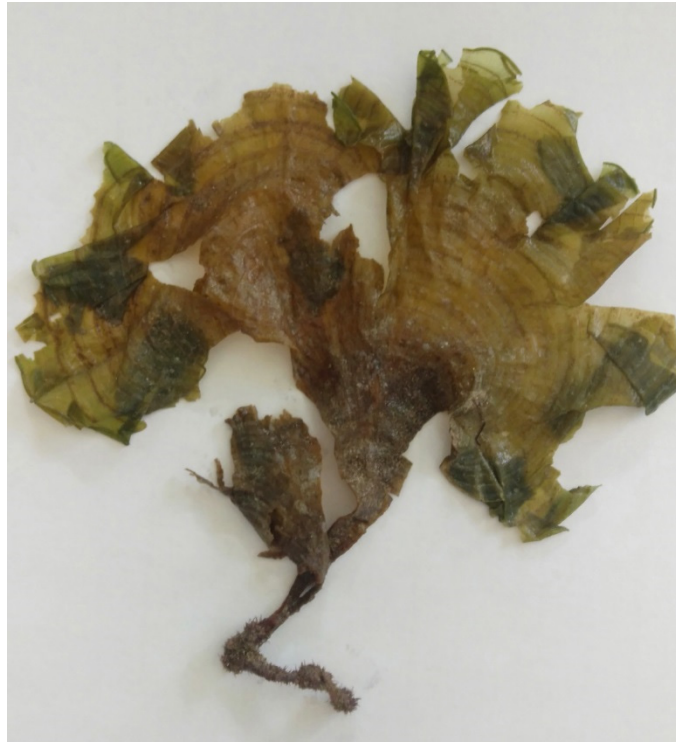

Plate 1. *Padina pavonica*
